# Supplementary material
Source: MDPI journal article supplement (https://www.mdpi.com/2413-8851/2/3/88)

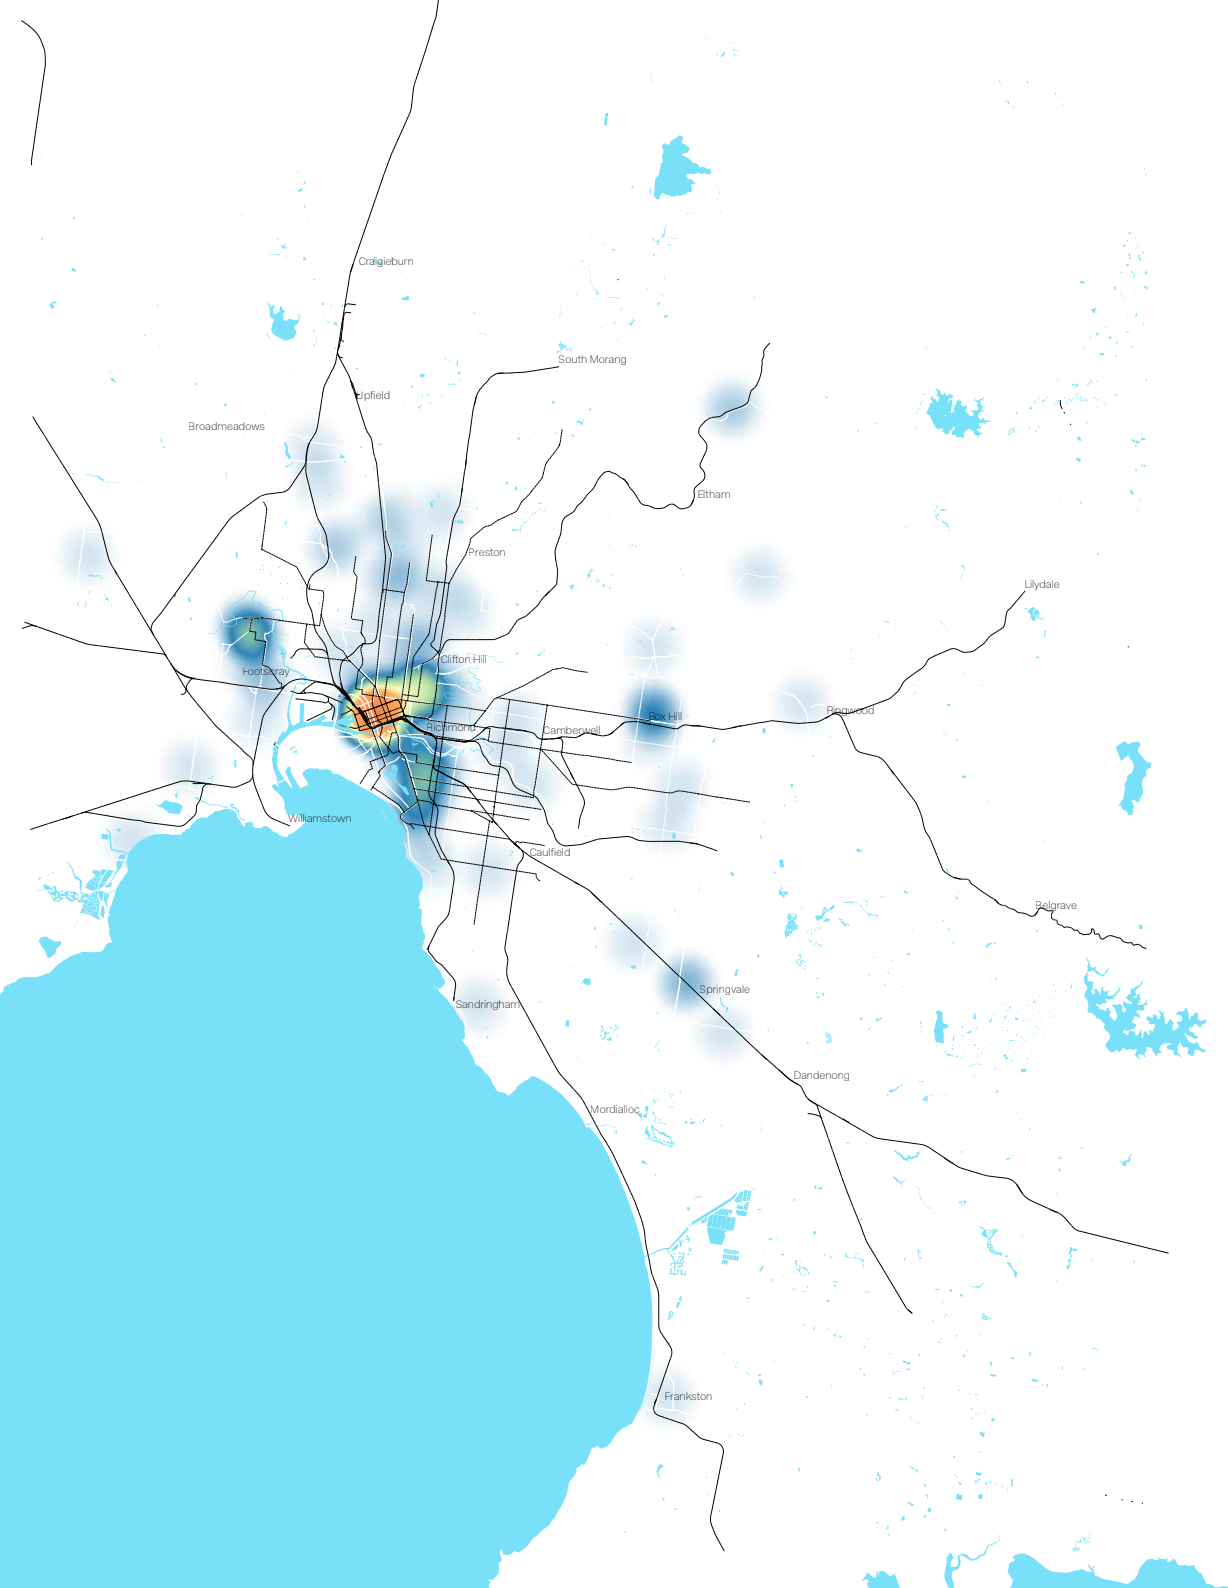

Supplement: s1 [file s1]

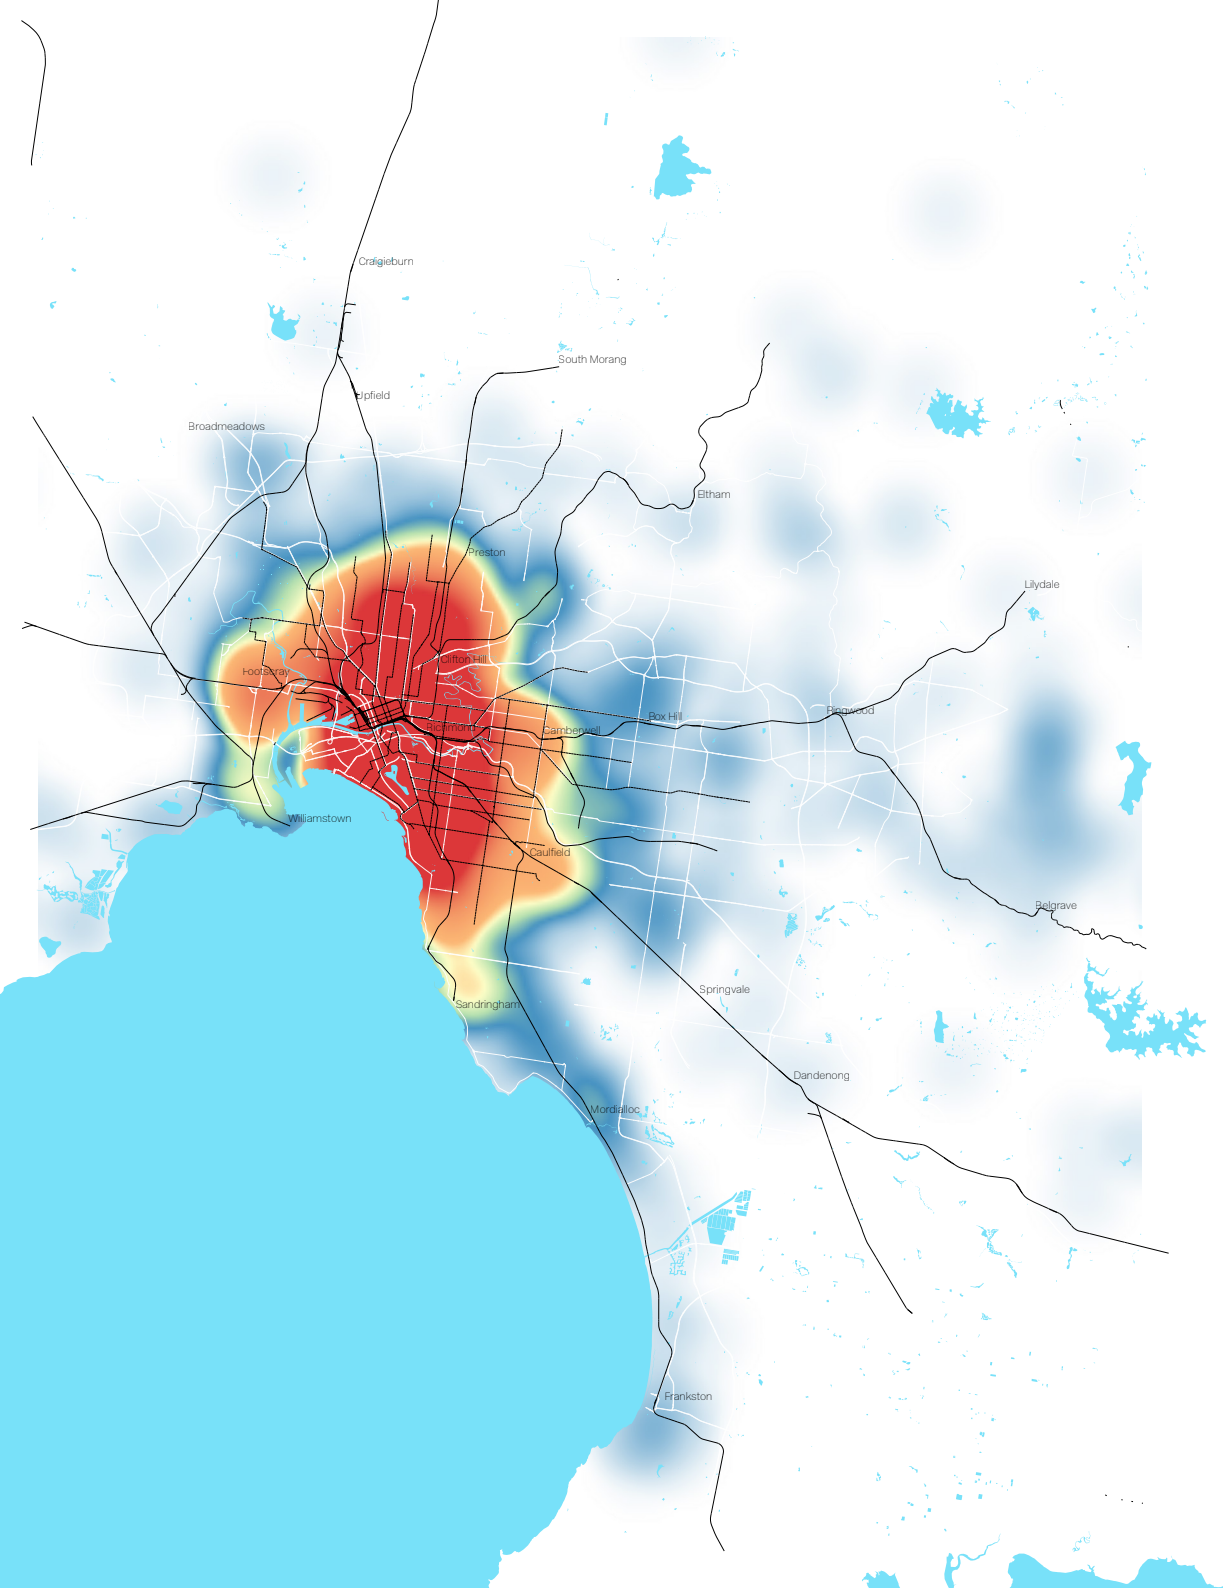

Supplement: s1 [file s1]

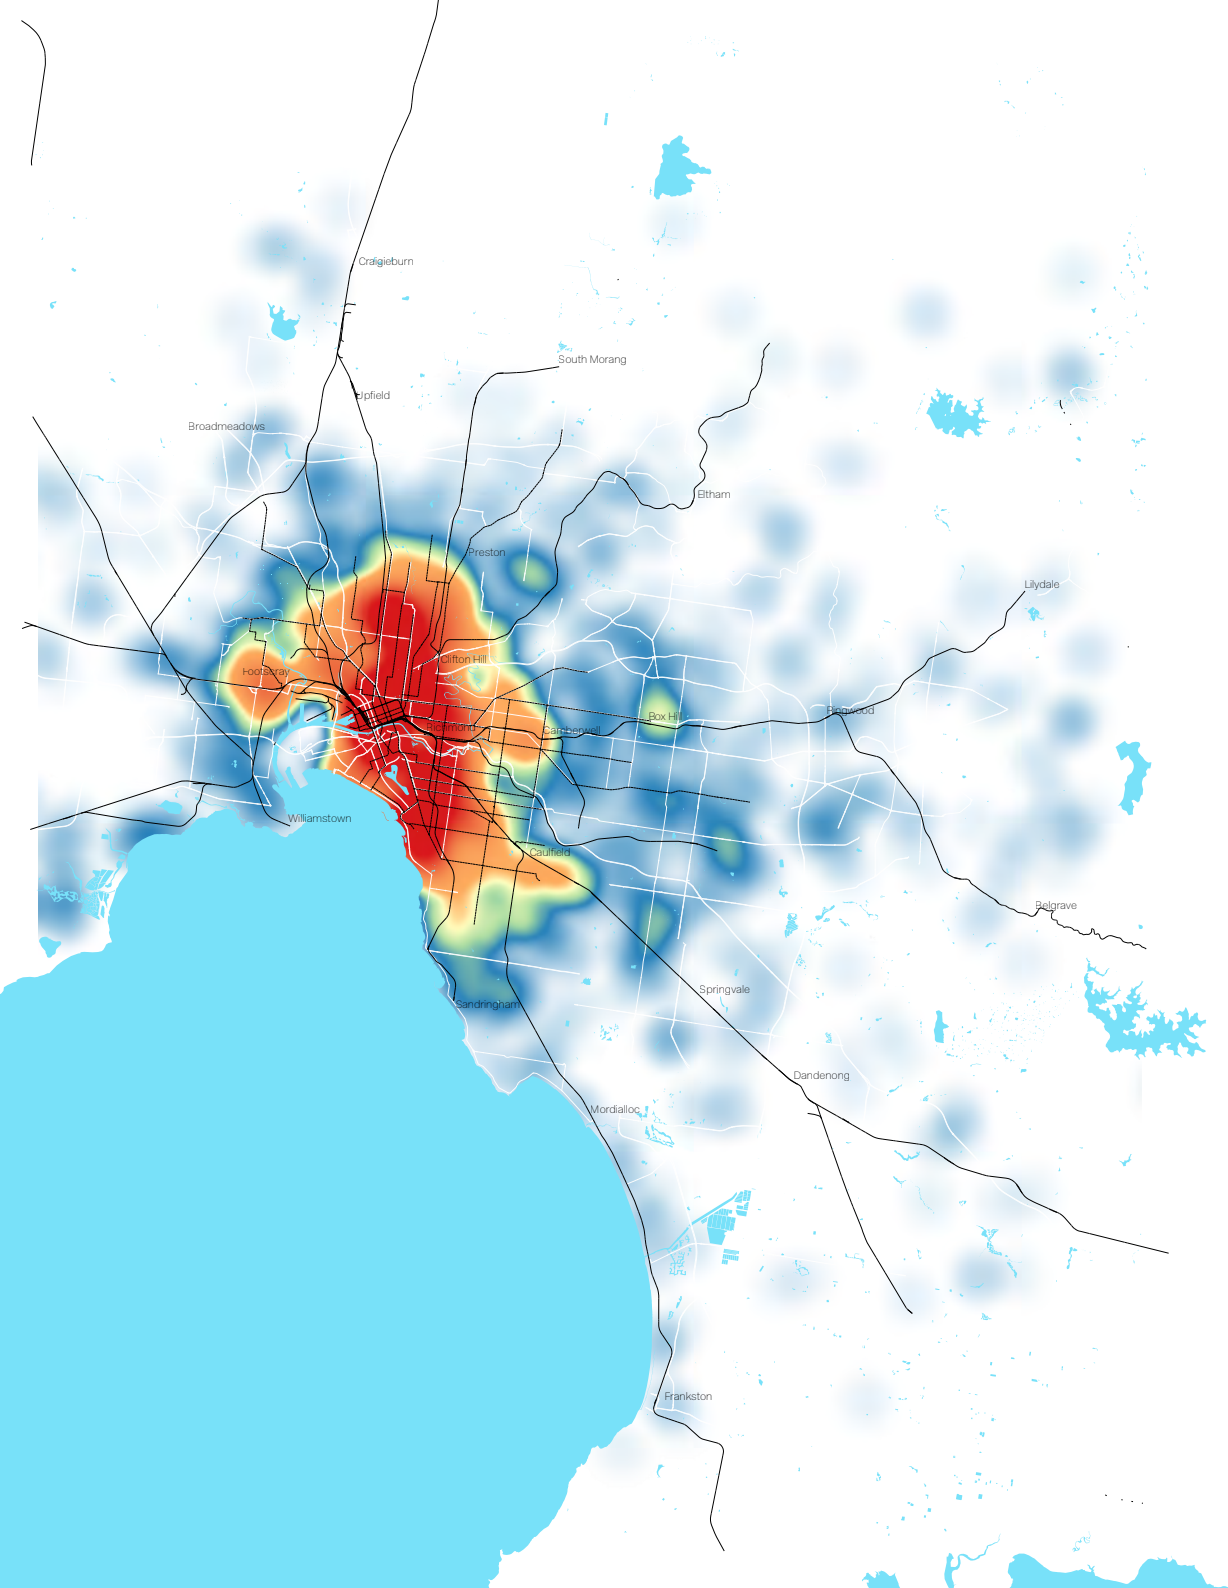

Supplement: s1 [file s1]
